# Supplementary material for: Dynamic evolution of the alpha (α) and beta (β) keratins has accompanied integument diversification and the adaptation of birds into novel lifestyles
Source: PubMed Central journal article supplement (PMC4264316; doi:10.1186/s12862-014-0249-1), 2014-12-12

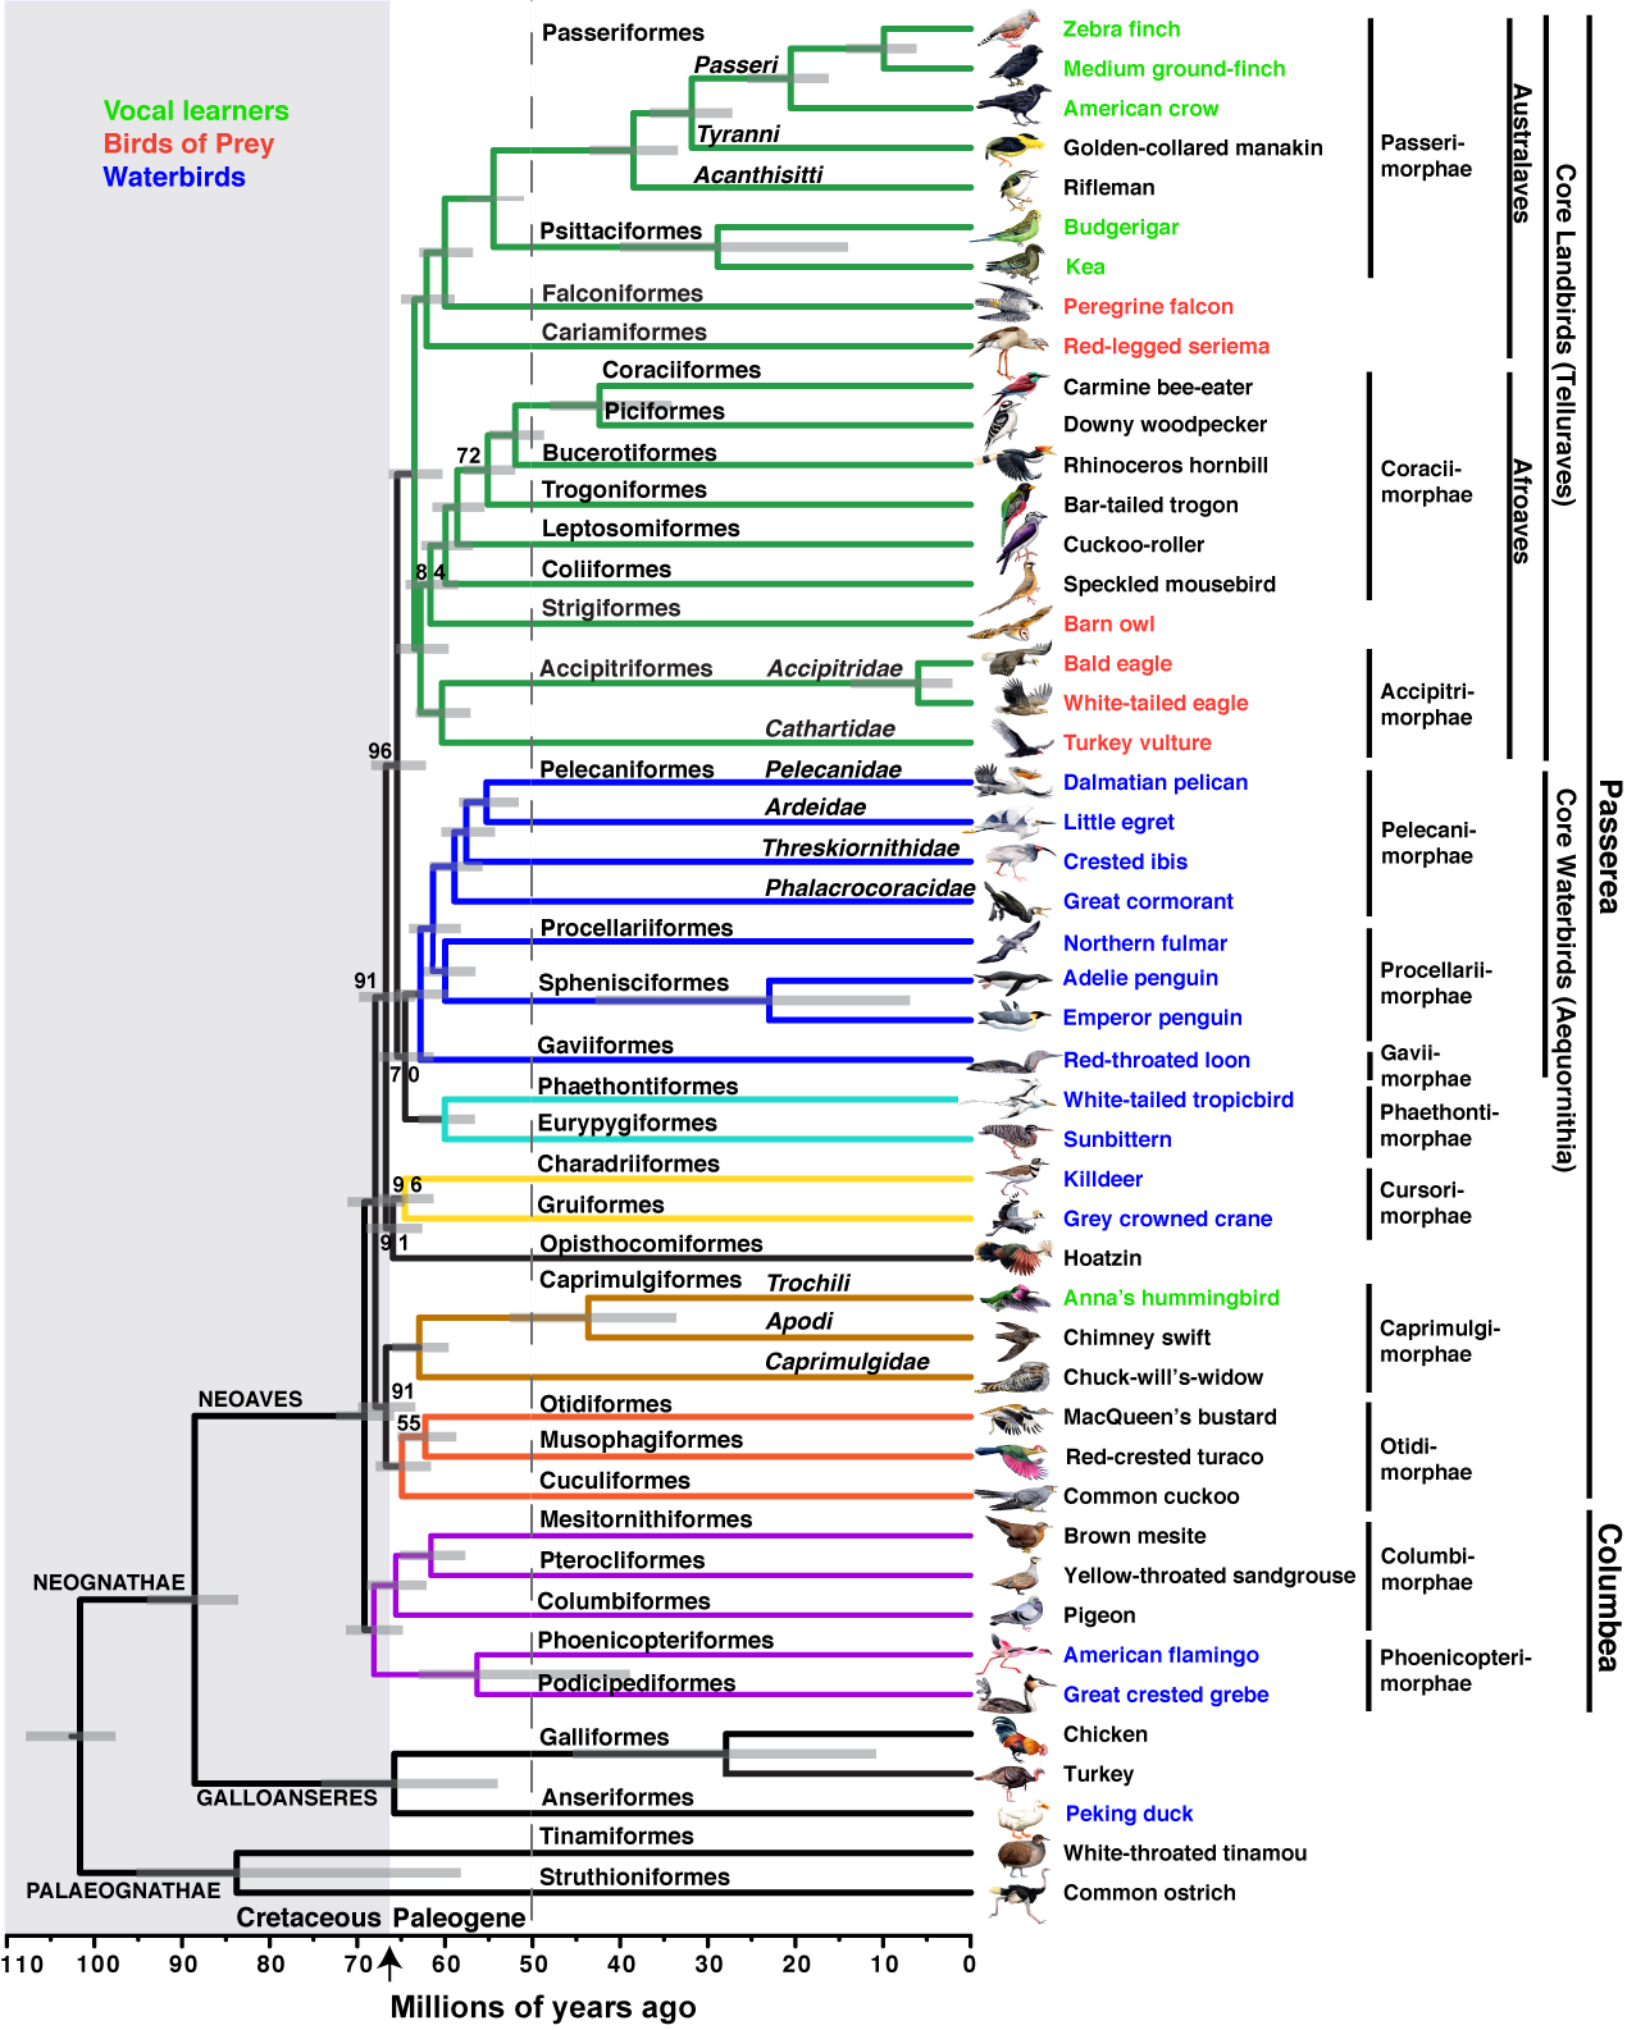

Supplement: 12862_2014_249_MOESM3_ESM.pdf [file 12862_2014_249_MOESM3_ESM.pdf]
